# Supplementary material
Source: publisher figshare collection journal article supplement (https://karger.figshare.com/ndownloader/files/14907173)

**Supplemental figures, supplemental figure legends**

Supplemental figure 1: Distribution of the frequencies, at which therapy line nivolumab was administered

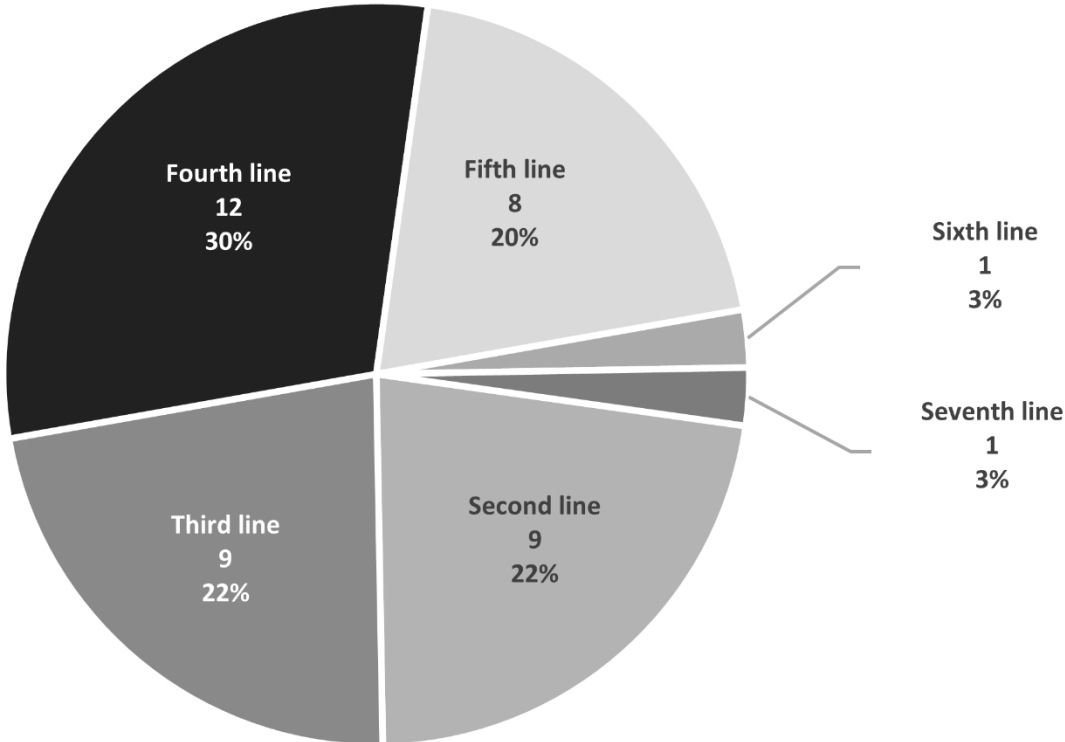

Supplemental figure 2: Relations of reasons for terminating nivolumab therapy (N=32)

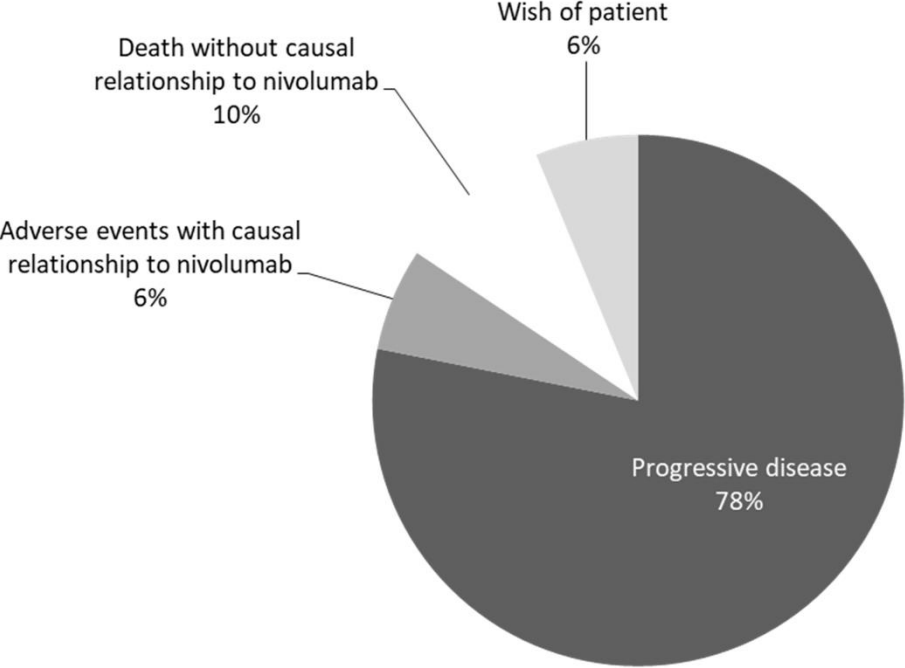

Supplement: Supplementary file 1 [file 14907173]
